# Supplementary material
Source: MDPI journal article supplement (https://www.mdpi.com/2038-8330/15/1/12)
Supplement: s1 [file s1]

Supplement to: Post-treatment neutrophil and lymphocyte counts predict progression free survival following first-line chemotherapy in Hodgkin’s lymphoma

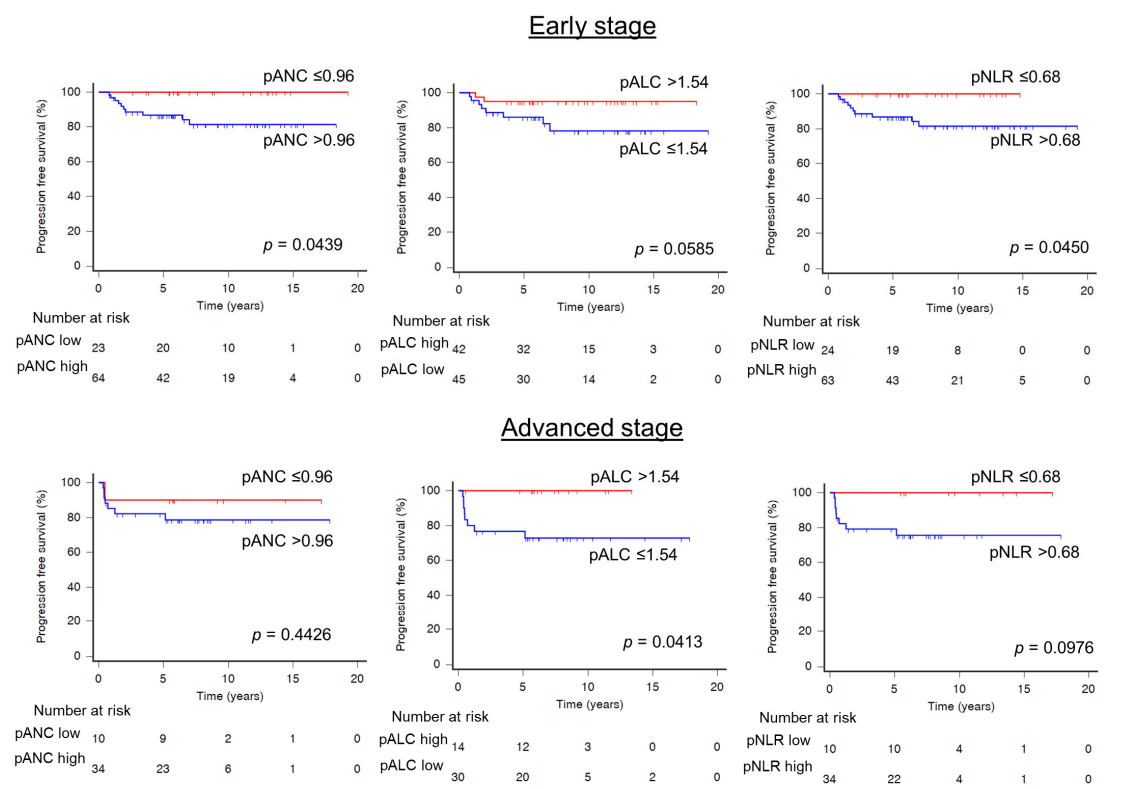

Figure S1. Prognostic significance of pANC, pALC and pNLR subgrouped by stage.

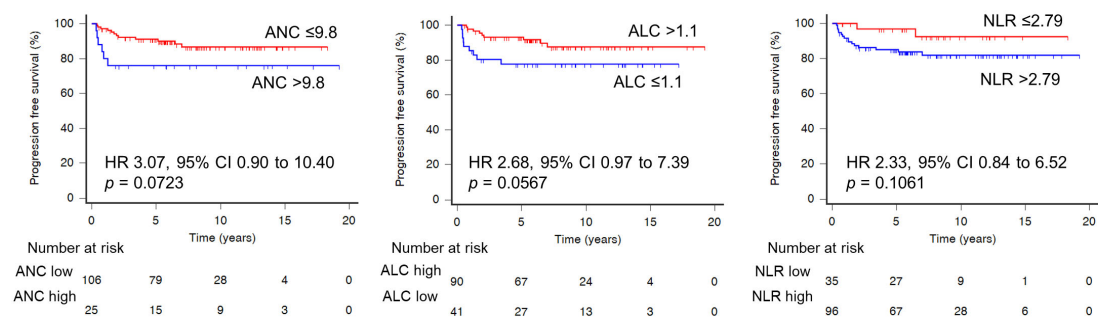

**Figure S2.** Prognostic significance of ANC, ALC and NLR at diagnosis.
